# Supplementary material for: Molecular Analysis of Endocrine Disruption in Hornyhead Turbot at Wastewater Outfalls in Southern California Using a Second Generation Multi-Species Microarray
Source: PLOS journal article supplement (doi:10.1371/journal.pone.0075553), 2013-09-25
Supplement: S2 (10.1371/journal.pone.0075553.s002) [file journal.pone.0075553.s002]

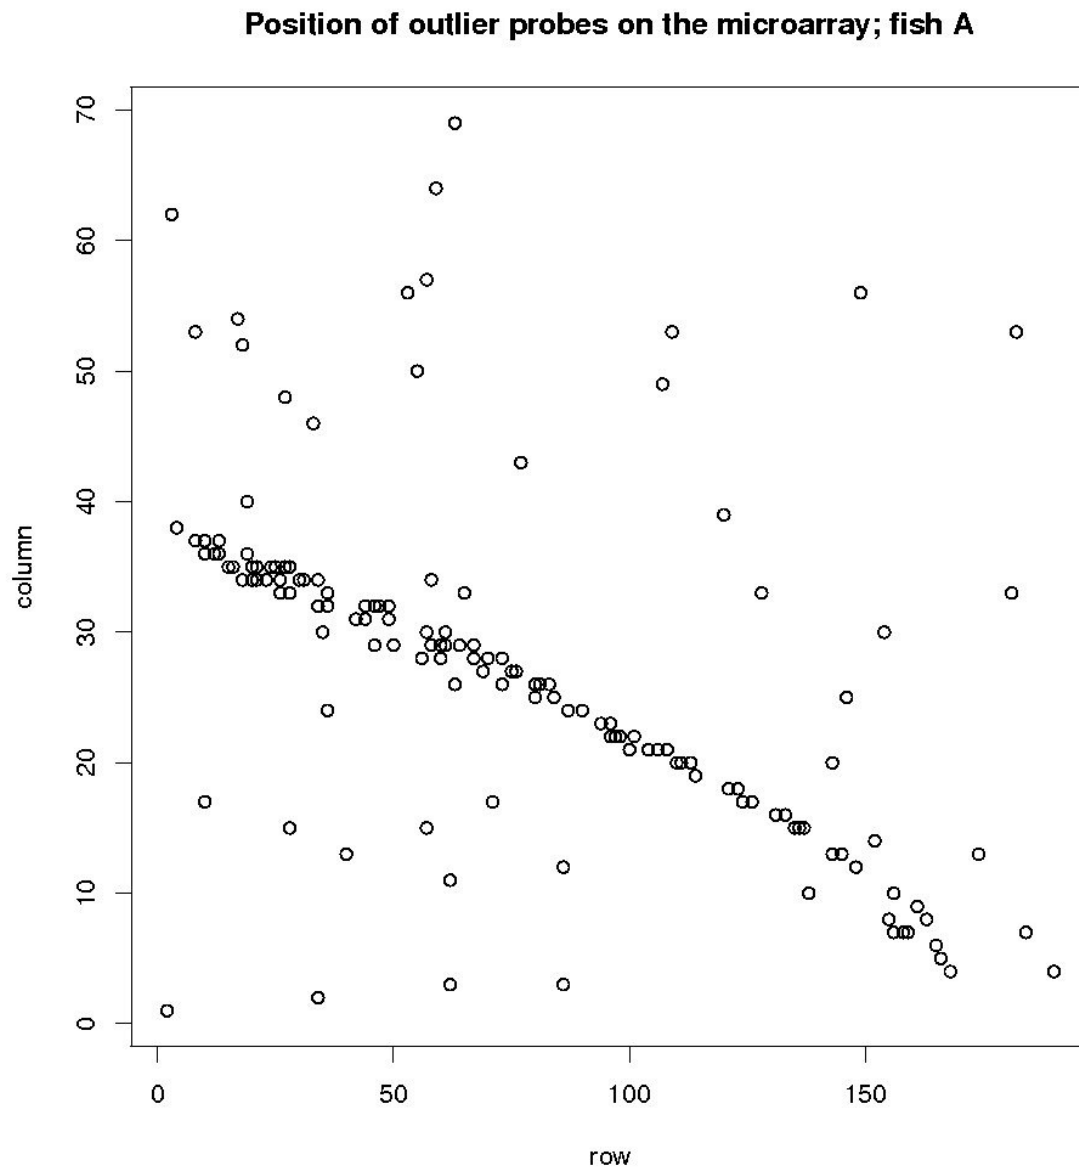

**Figure S2**

The probes were concentrated along a line, evidence that this represents a microarray artifact and that caution is warranted when performing differential expression measurements using microarrays.
